# Supplementary material for: Integrated and spectrally selective thermal emitters enabled by layered metamaterials
Source: publisher site journal article supplement (doi:10.1515/nanoph-2020-0578), 2021-01-01
Supplement: Supplementary file 1 [file j_nanoph-2020-0578_suppl.docx]

Supplementary Material

**Integrated and Spectrally Selective Thermal Emitters Enabled by Layered Metamaterials**

Yongkang Gong, Kang Li, Nigel Copner, Heng Liu, Meng Zhao, Bo Zhang, Andreas Pusch, Diana L. Huffaker, and Sang Soon Oh

1. **Design strategy and device optimization**

Our layered-metamaterial thermal emitter concept allows integrated thermophotonic devices that can significantly enhance emissivity in a broadband infrared regime and at the same time effectively suppress emissivity in the visible regime. According to Kirchhoff’s law, the emissivity is determined by the absorptivity, hence we can tailor the absorptivity of the LTEs to get the desired thermal radiation properties. The proposed concept utilizes two 1D finite photonic lattices of (SiO2/Si)*m* and (Si/Cr/Si)*n* as well as a Ni80Cr20 thin film to effectively

**Figure S1**. The real (left) and imaginary (right) part of the refractive indices of the materials used in the design of the proposed LTEs.

minimize the characteristic impedance mismatch to reduce light reflectivity at the wavelengths of interested, as depicted in Figure 1 in the main text. The characteristic impedance of the LTEs is given by recursive relation of 1

(S1)

where the subscript()represents the *k*th layer of the LTEs counted from the top layer of the LTEs. is the wave vector and and the thickness of the *k*th layer. and are the characteristic impedance of air and the whole LTE structure, respectively. Here, and represent the number of periods of the two lattices.

**Figure S2**. The optimization of the finite photonic lattice (SiO2/Si)*m* to have strong and broadband reflectivity in the visible wavelength regime. (a) Reflectivity and (b) absorptivity spectra of the lattice (SiO2/Si)*m* versus the number of periods . The lattice exhibits low absorptivity in the infrared regime, showing that the enhanced infrared emissivity characteristic of the proposed LTEs arises from interaction among the lattice (SiO2/Si)*m*, the lattice (Si/Cr/Si)*n* and the nanolayer Ni80Cr20. For the optimized structure, the thickness of SiO2 and Si in the unit cell of lattice (SiO2/Si)*m* is and , respectively, and the number of periods is 4. The optimization of the lattice (Si/Cr/Si)*n* is depicted in Figure S3.

Firstly, we design and optimize the (SiO2/Si)*m* at the visible wavelengths. We particularly choose SiO2 and Si materials for the grating because of their large refractive index difference, which allows generation of a broad photonic bandgap. We calculate the optical spectra with the

**Figure S3.** The optimization of the finite photonic lattice (Si/Cr/Si)*n* to have strong emissivity (absorptivity) of the proposed LTEs in the infrared regime. (a), (b) Dependence of the averaged impedance mismatch and the averaged emissivity of the LTEs on film thickness and , respectively. Here, the impedance mismatch and emissivity are averaged over the wavelength range of 1.4-14 . and are the thickness of Si and Cr in the unit cell of the (Si/Cr/Si)*n*. The impedance mismatch analysis in (a) agrees well with the emissivity spectra obtained by TMM in (b), indicating that strong infrared emissivity occurs at the film thickness within the region marked by dashed lines. (c) The averaged emissivity of the LTEs versus the number of the lattice periods . (d) versus wavelengths when , , and . The other film thickness in above simulations is the same as those in Figure S2.

transfer matrix method (TMM)2 using measured refractive indices for all the materials3 (see Figure S1). As shown in Figure S2a, a broadband photonic bandgap appears and covers wavelengths of 0.45-0.75 when the thickness of the Si (SiO2) thin films is (). It is noted that the reflectivity increases with period until reaches 4. When islarger than 4, the reflectivity hardly increases, and the photonic bandgap becomes narrower. Therefore, we choose as the optimized parameter. Figure S2b indicates that the (SiO2/Si)*m*has tiny absorptivity in the infrared regime except at wavelengths of 9-10 due to the large imaginary part of refractive index of SiO2 materialin this wavelength range.

**Figure S4**. Comparison of the emissivity spectra of the LTEs with metallic and dielectric lattice (Si/Cr/Si)*n*and (Si/Cr)*n* at angle , respectively. The geometric parameters are the same as Figure 1.

Based on the optimized lattice (SiO2/Si)*m*, we then optimize the lattice (Si/Cr/Si)*n* to minimize the impedance mismatch to achieve enhanced emissivity of the LTEs in the infrared regime. We calculate the averaged over the wavelength range of 1.4-4 at various and based on Equation S1, where and are the thickness of the Si and Cr nanolayers in the unit cell of the (Si/Cr/Si)*n*, respectively. We observe from Figure S3a that the smallest impedance mismatch occurs at the structure parameters within the marked

area, which is validated by the absorptivity spectra of the LTEs obtained by TMM as shown in Figure S3b. It shows that high absorptivity can be achieved when the impedance mismatch is small. The averaged emissivity versus the number of periods is plotted in Figure S3c. It is observed that the average emissivity increases with and reaches an almost stable value of ~0.81 when is larger than 5. Based on above analysis, we choose the optimized parameters of =100 nm, , and . We observe from Figure S3d that these parameters enable LTEs with large impedance mismatch in visible wavelengths and small impedance mismatch in the infrared range of 1.4-14 , which gives rise to selective broadband reflectivity characteristic (see Figure 1E in the main text). We stress that a photonic lattice with unit cell of dual nanolayers can also enable broadband emissivity, but the emissivity is smaller than that of the lattice with a unit cell of triple nanolayers in the infrared regime, as demonstrated in Figure S4.

1. **Fabrication of the designed LTEs**

We fabricate the designed LTE devices by electron-beam evaporation of the constituent materials onto polished planar quartz substrates with thickness. The thickness of each nanolayer during the material evaporation is measured with an in-situ quartz crystal monitor. Imaging of the nanolayer thickness is also performed by ultrahigh-resolution SEM (Hitachi Regulus 8220) scanning of the cross sections of the fabricated samples (Figure 1C). Conductive metal paste is applied to the edges of the NiCr layer as electrodes (see Figure 1A and Figure 3A). LTE devices with different dimensions are fabricated (Figure 3A and Figure S4). The I-V characteristics of the devices are measured using a probe station (Cascade Mps 150) and are plotted in Figure S4, illustrating that changing structure dimension can vary the electrical resistance and hence control the Joule heat generated from the LTEs.

1. **Angular dependent reflection spectra measurements**

We use a fiber-coupled light source (Thorlabs SLS202/M) to illuminate the fabricated devices that are placed on a rotary stage, and utilize a spectrometer (Ocean Optics USB-4000) to collect the angle-dependent reflected light spectra at the wavelength range of 0.5-1 . A Fourier transform infrared (FTIR) spectrometer (Nicolet iS50) with variable angle specular reflectance accessory (Harrick Seagull) is used to measure reflection spectra at wavelengths of 1.2-14 with angles of incidence varying from 5 deg up to 75 deg. In the two types of measurements, the light reflection of the samples is normalized against a broadband silver mirror reference to obtain reflectivity spectra. Since the transmission of the LTE is negligible (Figure 1F), we can derive the absorptivity and emissivity (Figure 2) directly from the measured reflectivity. For the emissivity spectral measurements at high temperature (Figure 3C), electric current from a DC power supplier passes through the NiCr layer of the LTEs to generate Joule heat to raise the temperature of the whole structure. A sensitive thermocouple and infrared camera detect the device surface temperature (Figure 3B).

**Figure S5**. The measured I-V curve of the fabricated LTEs with different width *w* and length *l* (see Figure 3A).The structure parameters are: the thickness of Si (SiO2) layer in the unit cell ofthe (SiO2/Si)*m* is 40 nm (100 nm), and the thickness of Si (Cr) layer in the unit cell of the (Si/Cr/Si) *n* is 100 nm (4 nm). The number of lattice periods *m* and *n* are 4 and 6, respectively, and the thickness of the Ni80Cr20 film is 300 nm.

1. **Spectral thermal radiation**

For the spectral thermal radiation measurements at various temperatures (Figure 3D), the radiation from the electrically heated LTEs is collimated by a 90° off-axis parabolic mirror with protected gold coating (Thorlabs MPD249-M01) toward the external port of the FTIR and is collected by a DTGS-KBr detector. To compare the measured results with theory, we calculate the spectral radiance by integrating the radiation within the angle of radiation from the normal, i.e.,

(S2)

**Figure S6**. (a) Photography image of the developed thermophonic measurement system to characterize the fabricated LTE devices. (b) The schematic diagram of the measurement system. The LTE samples in this measurement have width of and length of .

where is the spectral radiance of a blackbody at temperature . Here, ,, and are Planck constant, Boltzmann constant, and speed of light in vacuum, respectively. is the device temperature, andis the device emissivity at radiation angle and wavelength . We calculate the spectral radiance based on Equation S2 and plot it in Figure 3E. Clearly, the measured spectral power results are consistent with the calculated results, demonstrating that the radiated light power increases with the operating temperature of the LTEs. The reason for the discrepancy between the measured and calculated results are explained in the main text.

1. **Characterization of thermophonic dynamics, the total radiated power and electro-optical conversion efficiency**

A vacuum-based automatic measurement system is built to undertake the thermophonic dynamic measurements (Figure S6). Figure S7 shows that the vacuum system can effectively reduce heat convection loss of the LTE devices. In the system, automation modules of a programmable DC power supply and a control unit are controlled by LabVIEW software to simultaneously record the applied voltage, the chamber pressure, the current flowing through samples, and the operating temperature and the radiation power of the samples. The DC power

**Figure S7**. The measured surface temperature of the LTEs placed in vacuum and air, respectively. The device temperature is higher in vacuum than that in air (i.e., the ambient room environment) under the same input electric power due to the reduced heat convection loss. The LTE device in this measurement has width of and length of . The thickness of the nanolayers is the same as those in Figure S4.

supply feeds the samples with gradually increased voltage with a ramp rate 0.1 V per 15 mins (Figure 4A). The LTE samples are mounted on the sample holder (Figure 1B) and are inserted into the vacuum chamber that is pumped by a dry scroll pump. The structure and materials of the sample holder are carefully designed to reduce thermal conduction loss. Two gold-plated electrodes are used to apply the DC power to the samples, and a thermocouple is used to

**Figure S8.** Calibration of the light transmission efficiency from the input to the exit ports of the integrating sphere with a commercial blackbody as the light source.The radiated light measured at the input (a) and the power measured at the exit port (b) of the integrating sphere versus the operating temperature of the blackbody. (c) The light transmission efficiency of the integrating sphere obtained by .

measure the surface temperature of the samples via a point contact. The electrically heated samples are placed very closely to the chamber’s KBr window that is cooled by a circulating chiller to prevent over-heating. The radiated light from the heated samples passes though the KBr window and enters an a customized two-ports gold-coated integrating sphere that sits very close to the other side of the KBr window. The KBr window has a transmittance >90% in the wavelength range of 0.4-20 . The integrating sphere has a high diffuse reflectance of >98% in the wavelength range of 0.7-20 . A sensitive thermopile-based photodetector (spectral range 0.19-20 , Ophir Photonics) with a power meter is placed at the exit port of the integrating sphere to detect the radiated power.

To ensure the accuracy of the optical power measurement, we use a commercial blackbody as the light source to calibrate the light transmission efficiency from the input to the exit ports of the integrating sphere. Based on the measured radiated light power and of the blackbody at the input and the exit ports, we obtain the transmission efficiency of the integrating sphere by , as shown in Figure S8. The total radiated power of the LTEs can be estimated by normalizing the power of radiated light collected at the exit port of the integrating sphere to the light transmission efficiency of the integrating sphere (see Figures 4A-B in the main text).

Finally, we discuss the electro-optical conversion efficiency by considering LTEs with area driven by input electricity with power . We assume the input electricity is all converted into Joule heat to raise the device temperature . At the steady-state, the generated heat is dissipated into the environment through radiation () from the front (substrate) side of the LTEs, thermal conduction between the sample and the sample holder, and thermal convection in the filling gas, i.e.,

(S3)

The radiation power is determined by

, (S4)

(S5)

where and are angular and spectral emissivity of the LTEs from the front and the substrate sides, respectively. is the refractive index of the substate, and is the emissivity between the Ni80Cr20 and the substrate and is smaller than . anddepict the considered wavelength range. The spectral radiance of a blackbody is given in Eq. S2.

We observe from Eq. S3 that several measures could be taken to increase the electro-optical conversion efficiency (see Figure 4c in the main text) by means of, for example, minimizing the thermal contact between the sample and the sample holder to reduce and increasing the chamber vacuum to reduce . The thickness of the Ni80Cr20 layer inLTEs does not change the optical properties of the devices in the considered wavelength range as long as it is thicker than hundreds of nanometres, but it affects the electrical resistance and the temperature distributions of the LTEs. Since the Ni80Cr20 layer is much thinner than the thickness of the whole structure, we think its thickness change would have small effect on the electro-optical conversion efficiency.

**References**

1. Gong, Y. K., et al. Coherent emission of light using stacked gratings, Phys. Rev. B. **87**, 205121 (2013).

2. Born, M. & Wolf E., Principles of optics: electromagnetic theory of propagation, interference and diffraction of light, Elsevier, **2013**.

3. Palik, E. D., Handbook of optical constants of solids, Academic press, **1998**.
